# Supplementary material
Source: PubMed Central journal article supplement (PMC9718645)
Supplement: mmc1.pdf [file mmc1.pdf]

**Cell Host & Microbe, Volume 30**

**Supplemental information**

**Defining antigen targets to dissect vaccinia virus**

**and monkeypox virus-specific**

**T cell responses in humans**

**Alba Grifoni, Yun Zhang, Alison Tarke, John Sidney, Paul Rubiro, Maria Reina-Campos, Gilberto Filaci, Jennifer M. Dan, Richard H. Scheuermann, and Alessandro Sette**

**Supplemental Table 2.** Donor cohort vaccinated with Dryvax.

|                               | <b>Healthcare workers</b>       |                                  |                                            |                                               |
|-------------------------------|---------------------------------|----------------------------------|--------------------------------------------|-----------------------------------------------|
|                               | <i>Unexposed<br/>(n=15)</i>     | <i>non-vaccinated<br/>(n=21)</i> | <i>2 weeks post vaccination<br/>(n=19)</i> | <i>5-7 months post<br/>vaccination (n=18)</i> |
| <b>Age (years)</b>            | 18-26<br>[Median =23, IQR = 22] | 23-55<br>[Median =34, IQR = 27]  | 18-62<br>[Median =29, IQR = 25]            | 23-62<br>[Median =43, IQR = 34]               |
| <b>Gender</b>                 |                                 |                                  |                                            |                                               |
| <b>Male (%)</b>               | 53% (8/15)                      | 48% (10/21)                      | 53% (10/19)                                | 33% (6/18)                                    |
| <b>Female (%)</b>             | 47% (7/15)                      | 52% (11/21)                      | 47% (9/19)                                 | 67% (12/18)                                   |
| <b>Days post vaccination</b>  | N/A                             | N/A                              | 13-22<br>[Median =14, IQR = 14]            | 141-217<br>[Median =172, IQR = 142]           |
| <b>Sample collection date</b> | Jun 2019- Dec 2021              | Jun 2003-Oct 2005                | Jul 2003-Sep 2007                          | Jun 2003-Aug 2007                             |

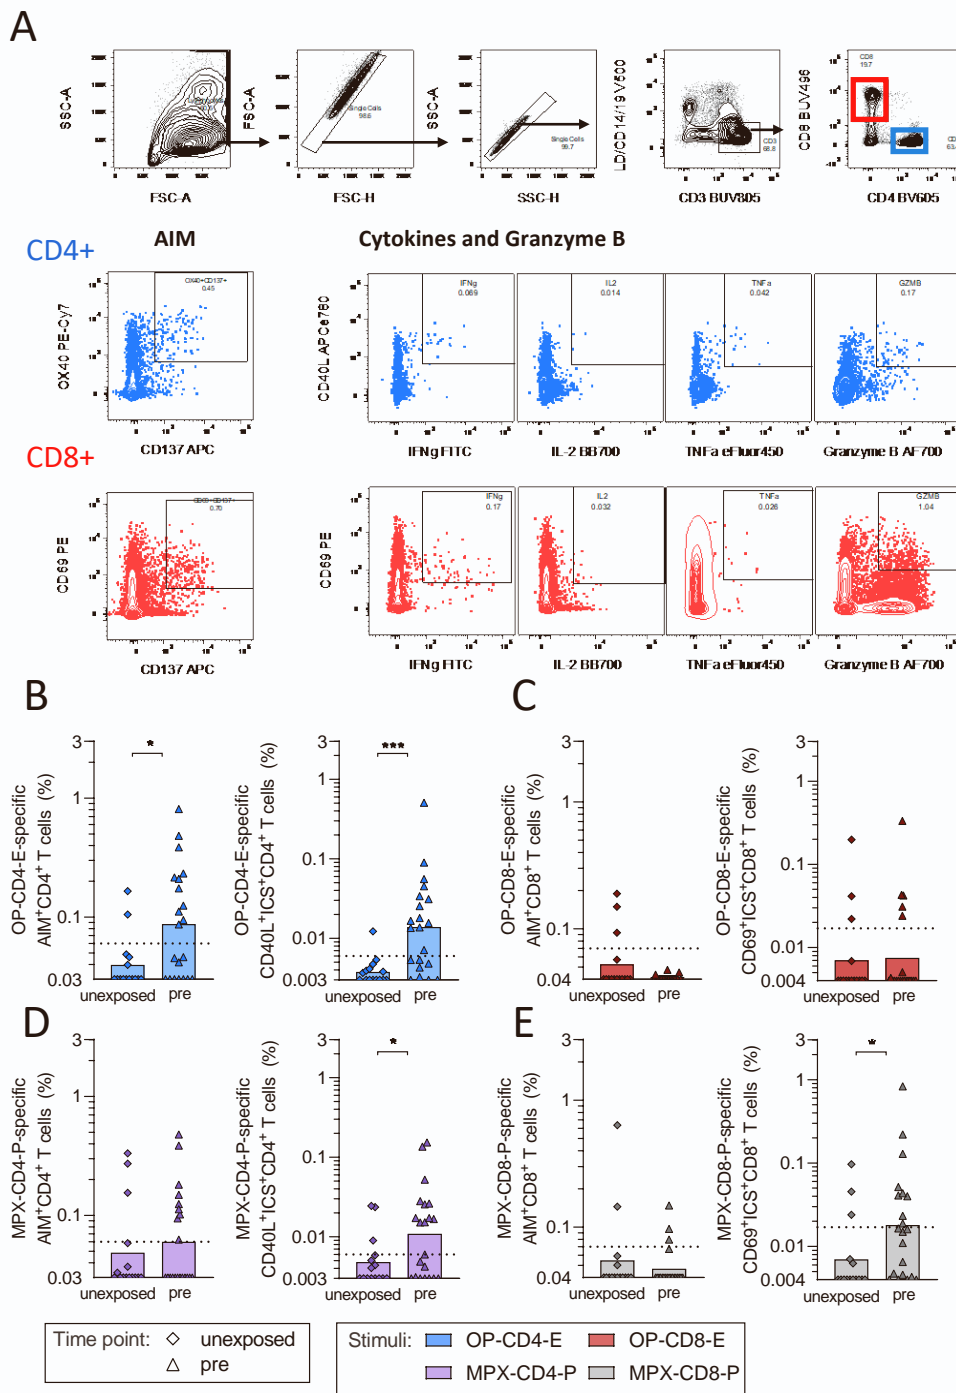

**Figure S1. Gating strategy for AIM+ICS assay and T cell reactivity in unexposed and pre-vaccinated individuals.**

Related to Figures 1 and 3. (A) Gating strategy for the AIM/ICS assays used in the study. The indicated AIM or intracellular markers were used to assess OPXV or MPXV specific T cell reactivity. For ICS, the total reactivity was calculated from cells positive for IFN  $\gamma$ , IL-2, TNF $\alpha$  or GZMB in combination with CD40L for CD4+ or CD69 for CD8+, with the exception of single positive GZMB cells which were excluded from the CD8 sum. Unexposed individuals (n=15, diamond) and pre-vaccinated healthcare workers (n=21, triangle) were tested in AIM+ICS assays for (B) CD4+ and (C) CD8+ T cell reactivity to the OPXV megapools, OP-CD4-E (blue) and OP-CD8-E (red). The same donors were tested for (D) CD4+ and (E) CD8+ T cell reactivity for MPXV predicted peptide pools, MPX-CD4-P (purple) and MPX-CD8-P (grey) respectively. The Y axis of each bar graph starts at the LOD and the LOS is indicated with a dotted line. Mann-Whitney T test was applied to each graph and p values symbols are shown when significant. \* p<0.05, \*\*\*p<0.001.

**Supplemental Table 3.** Summary of immunodominant MPXV proteins based on IEDB epitope orthologs and predicted MPXV T cell epitopes. This summary is based on epitope reassignment to MPXV orthologs and therefore encompasses differences based on different nomenclatures for the various OPXV species listed in Supplemental Table 1.

| Cell type     | Acc. no.      | VACWR antigen | transcription classification <sup>a</sup> | Function <sup>b</sup>             | Protein name                                      | Len (OP X)                            | IEDB epitopes | MPx antigen                        | MPX protein name                       | Len (MP X)   | # of predicted epitopes | Megapool   |    |            |
|---------------|---------------|---------------|-------------------------------------------|-----------------------------------|---------------------------------------------------|---------------------------------------|---------------|------------------------------------|----------------------------------------|--------------|-------------------------|------------|----|------------|
| CD4           | P20642        | A10L          | Late                                      | structural                        | Major core protein 4a precursor                   | 891                                   | 26            | A11L                               | peg.115  A11L                          | 891          | 32                      | MPX-CD4-P  |    |            |
|               | P21115        | B5R           | Early                                     | structural                        | Protein B5                                        | 317                                   | 19            | B6R                                | peg.159  EEV                           | 317          | 3                       |            |    |            |
|               | P20643        | A3L           | Intermediate                              | structural                        | Major core protein 4b                             | 644                                   | 11            | A4L                                | peg.108  A4L                           | 644          | 25                      |            |    |            |
|               | P21010        | D5R           | Early                                     | regulation                        | Primase D5                                        | 785                                   | 11            | E5R                                | peg.96  E5R                            | 785          | 28                      |            |    |            |
|               | QKE61287.1    | A26L/A30L     | Late                                      | unknown                           | A-type inclusion protein                          | 725                                   | 10            | A27L                               | peg.131  A27L                          | 696          | 11                      |            |    |            |
|               | P20981        | L4R           | Intermediate                              | regulation                        | Core protein VP8                                  | 251                                   | 9             | M4R                                | peg.0  DNA-binding virion core protein | 251          | 6                       |            |    |            |
|               | P33059        | H3L           | Intermediate                              | structural                        | Envelope protein H3                               | 325                                   | 9             | H3L                                | peg.87  H3L                            | 324          | 14                      |            |    |            |
|               | P68616        | A33R          | Early                                     | structural                        | Protein A33                                       | 185                                   | 8             | A35R                               | peg.139  A35R                          | 181          | 3                       |            |    |            |
|               | P68445        | B7R           | Late                                      | structural                        | Protein B7                                        | 182                                   | 8             | B8R                                | peg.161                                | 182          | 5                       |            |    |            |
|               | P20504        | J6R           | Early                                     | regulation                        | DNA-directed RNA polymerase 147 kDa polypeptide   | 1286                                  | 8             | L6R                                | peg.84  L6R                            | 1286         | 38                      |            |    |            |
|               | P20535        | A27L          | Intermediate                              | structural                        | 14 kDa fusion protein                             | 110                                   | 7             | A29L                               | peg.133  A29L                          | 110          | 1                       |            |    |            |
|               | P68693        | A48R          | Early                                     | regulation                        | Thymidylate kinase                                | 204                                   | 7             | A49R                               | peg.152  A49R                          | 204          | 3                       |            |    |            |
|               | 10AZH7/Q8JLB3 | D13L          | Intermediate                              | structural                        | 62 kDa protein                                    | 551                                   | 7             | E13L                               | peg.104  E13L                          | 551          | 17                      |            |    |            |
|               | P21052        | F11L          | Early                                     | unknown                           | Protein F11                                       | 354                                   | 7             | C17L                               | peg.38                                 | 354          | 10                      |            |    |            |
|               | 10AZK3/Q8JL90 | A24R          | Early                                     | regulation                        | DNA-directed RNA polymerase                       | 1164                                  | 5             | A25R                               | peg.129  A25R                          | 1164         | 29                      |            |    |            |
|               | 10AZI2/Q8JLA8 | A4L           | Early                                     | structural                        | Core protein                                      | 281                                   | 5             | A5L                                | peg.109  A5L                           | 281          | 1                       |            |    |            |
|               | 10AZN3/Q8JL68 | A56R          | Early                                     | structural                        | Hemagglutinin                                     | 319                                   | 5             | B2R                                | peg.152  B2R                           | 313          | 6                       |            |    |            |
|               | Q8V523        | F8L           | Early                                     | unknown                           | DNA polymerase                                    | 1006                                  | 5             | F8L                                | peg.52  DNA pol                        | 1006         | 37                      |            |    |            |
|               | P20540        | L1R           | Late                                      | structural                        | Protein L1                                        | 250                                   | 5             | M1R                                | peg.75  M1R                            | 250          | 7                       |            |    |            |
|               | CD8           | P20979        | D1R                                       | Early                             | regulation                                        | mRNA-capping enzyme catalytic subunit | 844           | 14                                 | E1R                                    | peg.92  E1R  | 845                     |            | 71 | MPX-CD8-P1 |
|               |               | P20643        | A3L                                       | Intermediate                      | structural                                        | Major core protein 4b                 | 644           | 13                                 | A4L                                    | peg.108  A4L | 644                     |            | 25 |            |
| P20504        |               | J6R           | Early                                     | regulation                        | DNA-directed RNA polymerase 147 kDa polypeptide   | 1286                                  | 12            | L6R                                | peg.84  L6R                            | 1286         | 38                      |            |    |            |
| P21004        |               | B8R           | Early                                     | virulence                         | Soluble interferon gamma receptor B8              | 272                                   | 11            | B9R                                | peg.162  B9R                           | 267          | 22                      |            |    |            |
| Q8V523        |               | F8L           | Early                                     | unknown                           | DNA polymerase                                    | 1006                                  | 11            | F8L                                | peg.52  DNA pol                        | 1006         | 37                      |            |    |            |
| P21010        |               | D5R           | Early                                     | regulation                        | Primase D5                                        | 785                                   | 11            | E5R                                | peg.96  E5R                            | 785          | 28                      | MPX-CD8-P2 |    |            |
| P20642        |               | A10L          | Late                                      | structural                        | Major core protein 4a precursor                   | 891                                   | 10            | A11L                               | peg.115  A11L                          | 891          | 32                      |            |    |            |
| P33059        |               | H3L           | Intermediate                              | structural                        | Envelope protein H3                               | 325                                   | 10            | H3L                                | peg.87  H3L                            | 324          | 14                      |            |    |            |
| P20502        |               | 18R           | Intermediate                              | structural                        | RNA helicase NPH-II                               | 676                                   | 10            | 18R                                | peg.64  RNA helicase                   | 676          | 51                      |            |    |            |
| 10AZK3/Q8JL90 |               | A24R          | Early                                     | regulation                        | DNA-directed RNA polymerase                       | 1164                                  | 9             | A25R                               | peg.129  A25R                          | 1164         | 29                      |            |    |            |
| P20640        |               | M1L           | Early                                     | unknown                           | Ankyrin repeat protein M1                         | 472                                   | 9             | O1L                                | peg.20  ankyrin-like protein           | 442          | 24                      |            |    |            |
| P68592        |               | A17L          | Late                                      | structural                        | Virion membrane protein A17 precursor             | 203                                   | 8             | A18L                               | peg.122  A18L                          | 204          | 15                      |            |    |            |
| 10AZI4/Q8JLA6 |               | A6L           | Intermediate                              | unknown                           | Virion morphogenesis protein                      | 372                                   | 8             | A7L                                | peg.111  A7L                           | 372          | 22                      |            |    |            |
| P20998        |               | A23R          | Early                                     | regulation                        | Intermediate transcription factor 3 large subunit | 382                                   | 7             | A24R                               | peg.128  A24R                          | 382          | 25                      | MPX-CD8-P3 |    |            |
| P20535        |               | A27L          | Intermediate                              | structural                        | 14 kDa fusion protein                             | 110                                   | 7             | A29L                               | peg.133  A29L                          | 110          | 1                       |            |    |            |
| 10AZH7/Q8JLB3 |               | D13L          | Intermediate                              | structural                        | 62 kDa protein                                    | 551                                   | 7             | E13L                               | peg.104  E13L                          | 551          | 17                      |            |    |            |
| P33871        |               | C16L          | unknown                                   | unknown                           | Protein F12                                       | 635                                   | 7             | C18L                               | peg.39  EEV                            | 635          | 40                      |            |    |            |
| P33862        |               | E2L           | Early                                     | unknown                           | Protein E2                                        | 737                                   | 7             | F2L                                | peg.46                                 | 737          | 55                      |            |    |            |
| P20501        |               | I7L           | Late                                      | structural                        | Core protease I7                                  | 423                                   | 7             | I7L                                | peg.63  I7L                            | 423          | 26                      |            |    |            |
| P21103        |               | B25R          | Late                                      | unknown                           | Protein C19/B25                                   | 259                                   | 7             | J1R                                | peg.177  J1R                           | 588          | 33                      | MPX-CD8-P4 |    |            |
| P20991        |               | A14L          | Late                                      | structural                        | Virion membrane protein A14                       | 90                                    | 6             | A15L                               | peg.119  A15L                          | 90           | 5                       |            |    |            |
| 10AZJ7/Q8JL96 |               | A18R          | Early                                     | regulation                        | DNA helicase                                      | 493                                   | 6             | A19R                               | peg.123  A19R                          | 492          | 35                      |            |    |            |
| QKE61287.1    |               | A26L/A30L     | Late                                      | unknown                           | A-type inclusion protein                          | 725                                   | 6             | A27L                               | peg.131  A27L                          | 696          | 11                      |            |    |            |
| 10AZI2/Q8JLA8 |               | A4L           | Early                                     | structural                        | Core protein                                      | 281                                   | 6             | A5L                                | peg.109  A5L                           | 281          | 1                       |            |    |            |
| P20635        |               | A7L           | Late                                      | regulation                        | Early transcription factor 82 kDa subunit         | 710                                   | 6             | A8L                                | peg.112  A8L                           | 710          | 50                      |            |    |            |
| P20986        |               | A8R           | Early                                     | regulation                        | Intermediate transcription factor 3 small subunit | 288                                   | 6             | A9R                                | peg.113  A9R                           | 292          | 18                      |            |    |            |
| P21077        |               | B19R          | Early                                     | virulence                         | Surface antigen S                                 | 353                                   | 6             | B16R                               | peg.167  B16R                          | 351          | 25                      |            |    |            |
| 10AZH6/Q8JLB4 |               | D12L          | Early                                     | regulation                        | Virus termination factor small subunit            | 287                                   | 6             | E12L                               | peg.103  E12L                          | 287          | 28                      |            |    |            |
| 10AZD2/Q8JLF2 |               | I4L           | Early                                     | regulation                        | Ribonucleoside-diphosphate reductase              | 771                                   | 6             | I4L                                | peg.60  I4L                            | 771          | 50                      |            |    |            |
| P20538        |               | H5R           | Early                                     | regulation                        | Late transcription elongation factor H5           | 203                                   | 6             | H5R                                | peg.89  VLTF-4                         | 210          | 12                      |            |    |            |
| P68467        |               | K7R           | Early                                     | unknown                           | Protein K7                                        | 149                                   | 6             | C6R                                | peg.27                                 | 149          | 7                       |            |    |            |
| P20989        |               | A12L          | Intermediate                              | structural                        | 25 kDa core protein A12L                          | 192                                   | 5             | A13L                               | peg.117  A13L                          | 190          | 6                       | MPX-CD8-P5 |    |            |
| P20995        |               | A20R          | Early                                     | regulation                        | DNA polymerase processivity factor component A20  | 426                                   | 5             | A22R                               | peg.126  A22R                          | 426          | 39                      |            |    |            |
| P20499        | I3L           | Early         | regulation                                | Protein I3                        | 269                                               | 5                                     | I3L           | peg.59  DNA-binding phosphoprotein | 269                                    | 17           |                         |            |    |            |
| P21081        | E3L           | Early         | virulence                                 | RNA-binding protein E3            | 190                                               | 5                                     | F3L           | peg.47  dsRNA-binding protein      | 153                                    | 13           |                         |            |    |            |
| P21049        | E8R           | Intermediate  | structural                                | Protein E8                        | 273                                               | 5                                     | F7R           | peg.51                             | 273                                    | 20           |                         |            |    |            |
| P21093        | O1L           | Early         | unknown                                   | Protein O1                        | 666                                               | 5                                     | Q1L           | peg.55                             | 665                                    | 67           |                         |            |    |            |
| P21026        | G5R           | Early         | unknown                                   | Putative nuclease G5              | 434                                               | 5                                     | G5R           | peg.69                             | 434                                    | 22           |                         |            |    |            |
| P20638        | F13L          | Intermediate  | structural                                | Envelope phospholipase F13        | 372                                               | 5                                     | C19L          | peg.40  palmytilated EEV           | 372                                    | 17           |                         |            |    |            |
| P33801        | C14L          | unknown       | unknown                                   | Serine/threonine-protein kinase 2 | 439                                               | 5                                     | C16L          | peg.37  Ser Thr kinase             | 439                                    | 32           |                         |            |    |            |

<sup>a</sup>based on Yang et al., 2011 JVI

<sup>b</sup>based on Moutfias et al., 2010 Future Microb

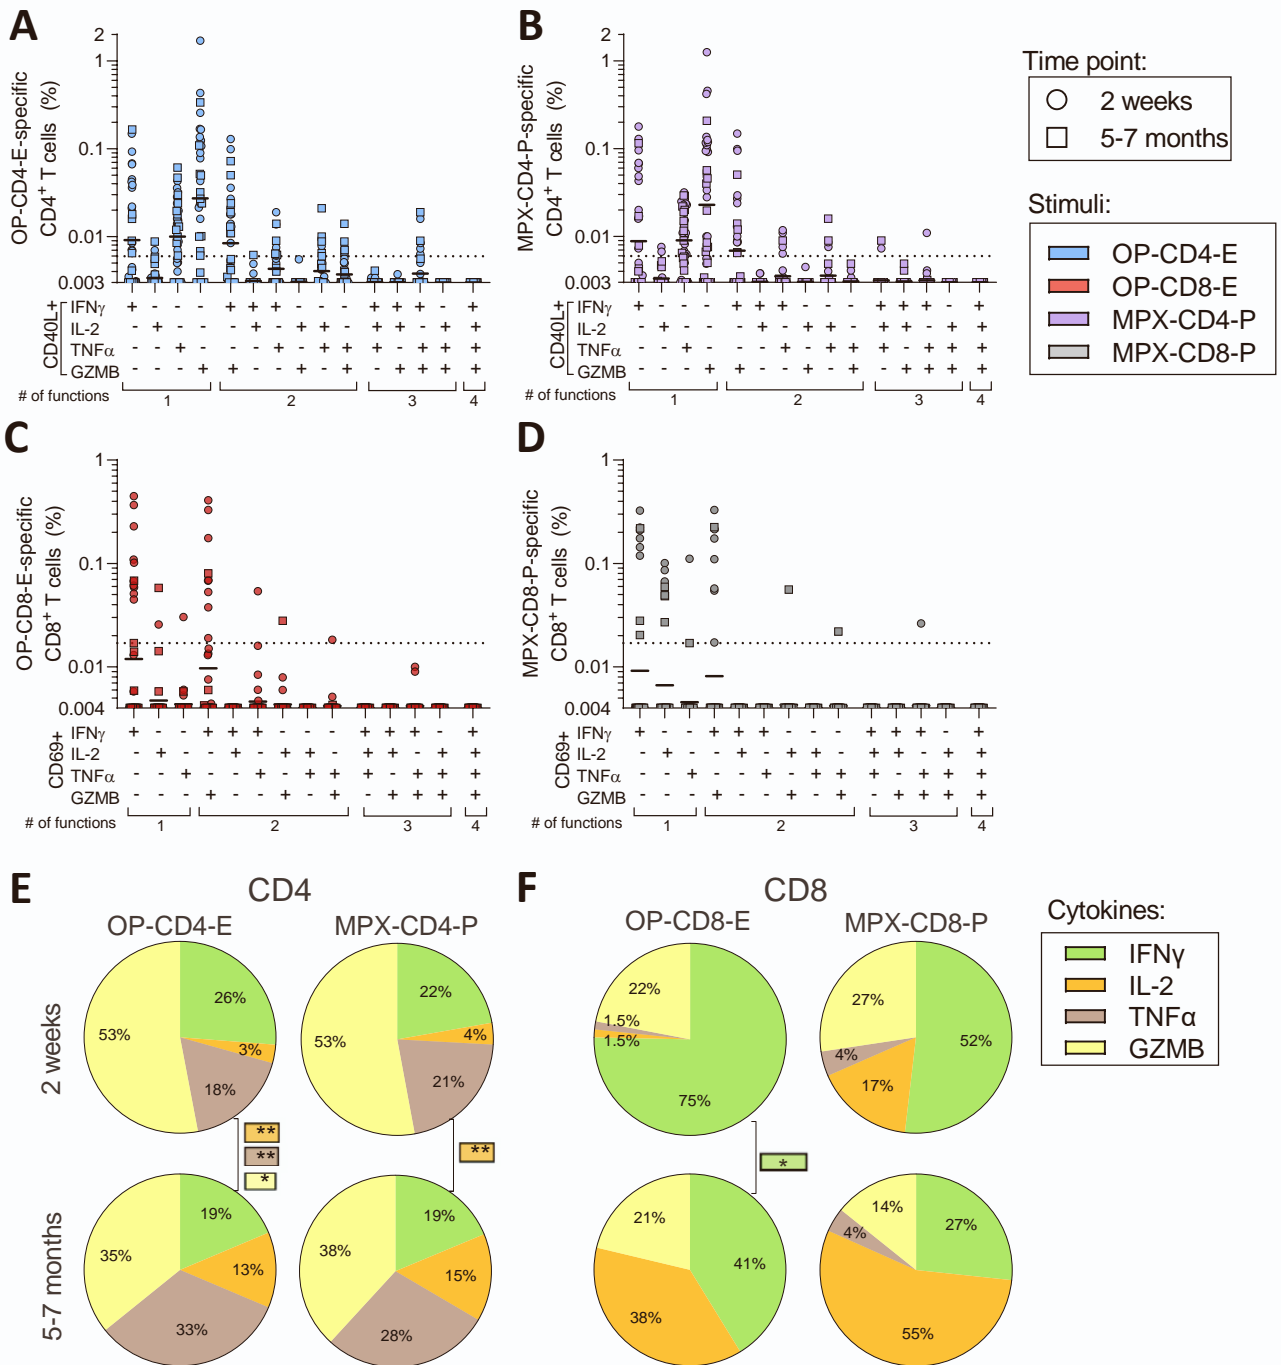

**Figure S2. Quality of OPXV and MPXV-specific- T cell responses.**

Related to Figures 1 and 3. PBMCs were collected from donors two weeks after vaccination with Dryvax (n=19, circle) and five to seven months after vaccination (n=18, squares) and tested in AIM+ICS assays for T cell reactivity to OPXV and MPXV. (A – B) Boolean gating of (A) OP-CD4-E- or (B) MPX-CD4-P-specific CD4<sup>+</sup> ICS reactivity is shown for CD40L<sup>+</sup> CD4<sup>+</sup> T cells in combination with IFN $\gamma$ , IL-2, TNF $\alpha$  and GZMB. (C - D) Boolean gating of (C) OP-CD8-E- or (D) MPX-CD8-P-specific CD8 ICS reactivity is shown for CD69<sup>+</sup> CD8 T cells in combination with IFN $\gamma$ , IL-2, TNF $\alpha$  or GZMB. The Y axis of each bar graph starts at the LOD and the LOS is indicated with a dotted line. Contribution of IFN $\gamma$ , IL-2, TNF $\alpha$  and GZMB to the total of (E) CD4 or (F) CD8<sup>+</sup> ICS responses to OP and MPX megapools at two weeks and 5-7 months post vaccination. Mann-Whitney T test was applied to each pie chart and p values symbols are shown when significant. \* p<0.05, \*\*p<0.01.
